# Supplementary material
Source: publisher figshare collection journal article supplement (https://acs.figshare.com/ndownloader/files/5884248)
Supplement: Supplementary file 1 [file 5884248]

## Supporting Information

### Quantifying steric effects of $\alpha$ -diimine ligands. Oxidative addition of MeI to Rh(I) and migratory insertion in Rh(III) complexes.

Luca Gonsalvi,<sup>a†</sup> Joseph A. Gaunt,<sup>a</sup> Harry Adams,<sup>a</sup> Aurora Castro,<sup>a</sup> Glenn J. Sunley,<sup>b\*</sup>

and Anthony Haynes<sup>a\*</sup>

<sup>a</sup> Department of Chemistry, University of Sheffield, Sheffield, UK, S3 7HF

<sup>b</sup> BP Chemicals Ltd, Hull Research and Technology Centre, Saltend, Hull, UK, HU12 8DS

#### Kinetic data

**Table S1.** Observed pseudo first order rate constants,  $k_{\text{obs}}$ , for oxidative addition of MeI to **1a** in  $\text{CH}_2\text{Cl}_2$ .

| [MeI]/M | $10^3 k_{\text{obs}}/\text{s}^{-1}$ |      |      |      |      |
|---------|-------------------------------------|------|------|------|------|
|         | 15°C                                | 20°C | 25°C | 30°C | 35°C |
| 0.08    |                                     |      | 1.19 |      |      |
| 0.16    | 1.29                                | 1.76 | 2.30 | 2.82 | 3.64 |
| 0.24    |                                     |      | 3.15 |      |      |
| 0.32    |                                     |      | 4.10 |      |      |

**Table S2.** Observed pseudo first order rate constants,  $k_{\text{obs}}$ , for oxidative addition of MeI to **1b** in  $\text{CH}_2\text{Cl}_2$ .

| [MeI]/M | $10^3 k_{\text{obs}}/\text{s}^{-1}$ |      |      |      |      |
|---------|-------------------------------------|------|------|------|------|
|         | 15°C                                | 20°C | 25°C | 30°C | 35°C |
| 0.8     |                                     |      | 0.81 |      |      |
| 1.6     |                                     |      | 1.62 |      |      |
| 2.4     |                                     |      | 2.24 |      |      |
| 3.2     | 1.90                                | 2.56 | 3.45 | 4.46 | 5.66 |
| 4.8     |                                     |      | 4.72 |      |      |
| 6.4     |                                     |      | 5.21 |      |      |
| 8.0     |                                     |      | 6.66 |      |      |

<sup>†</sup> Current address: Institute for the Chemistry of Organometallic Compounds, National Research Council (ICCOM-CNR), Via J Nardi 39-41, 50132, Firenze, Italy.

**Table S3.** Observed pseudo first order rate constants,  $k_{\text{obs}}$ , for oxidative addition of MeI to **1c** in  $\text{CH}_2\text{Cl}_2$ .

| [MeI]/M | $10^3 k_{\text{obs}}/\text{s}^{-1}$ |      |       |      |      |
|---------|-------------------------------------|------|-------|------|------|
|         | 15°C                                | 20°C | 25°C  | 30°C | 35°C |
| 1.6     |                                     |      | 2.30  |      |      |
| 3.2     | 2.61                                | 3.51 | 4.67  | 6.43 | 8.29 |
| 4.8     |                                     |      | 5.78  |      |      |
| 6.4     |                                     |      | 9.32  |      |      |
| 8.0     |                                     |      | 11.63 |      |      |

**Table S4.** Observed pseudo first order rate constants,  $k_{\text{obs}}$ , for oxidative addition of MeI to **1d** in  $\text{CH}_2\text{Cl}_2$ .

| [MeI]/M | $10^3 k_{\text{obs}}/\text{s}^{-1}$ |      |      |      |      |
|---------|-------------------------------------|------|------|------|------|
|         | 15°C                                | 20°C | 25°C | 30°C | 35°C |
| 0.024   | 1.97                                |      |      |      |      |
| 0.048   | 4.50                                | 5.61 | 7.20 | 8.17 | 9.51 |
| 0.072   | 6.91                                |      |      |      |      |
| 0.096   | 9.21                                |      |      |      |      |

**Table S5.** Observed pseudo first order rate constants,  $k_{\text{obs}}$ , for oxidative addition of MeI to **1e** in  $\text{CH}_2\text{Cl}_2$ .

| [MeI]/M | $10^3 k_{\text{obs}}/\text{s}^{-1}$ |      |      |      |      |
|---------|-------------------------------------|------|------|------|------|
|         | 15°C                                | 20°C | 25°C | 30°C | 35°C |
| 0.058   |                                     |      | 4.76 |      |      |
| 0.080   | 4.19                                | 5.37 | 6.59 | 6.97 | 9.50 |
| 0.118   |                                     |      | 10.1 |      |      |
| 0.160   |                                     |      | 13.7 |      |      |

**Table S6.** Forward and reverse rate constants and equilibrium constants for oxidative addition of MeI to **1f** and migratory insertion in **2f** (measured in CH<sub>2</sub>Cl<sub>2</sub>).

| T/ °C | $10^3 \text{ } k_1/\text{M s}^{-1}$ | $10^4 \text{ } k_{-1}/\text{s}^{-1}$ | $10^4 \text{ } k_2/\text{s}^{-1}$ | $10^3 \text{ } k_{-2}/\text{s}^{-1}$ | $K_1/\text{M}^{-1}$ | $K_2$ |
|-------|-------------------------------------|--------------------------------------|-----------------------------------|--------------------------------------|---------------------|-------|
| 15    | 5.31                                | 1.63                                 | 1.55                              | 3.67                                 | 32.57               | 4.38  |
| 20    | 7.37                                | 3.18                                 | 3.02                              | 6.65                                 | 23.51               | 4.58  |
| 25    | 8.34                                | 5.23                                 | 5.82                              | 11.3                                 | 15.97               | 5.16  |
| 30    | 11.1                                | 8.22                                 | 8.22                              | 17.8                                 | 13.49               | 4.81  |
| 35    | 10.9                                | 10.6                                 | 15.2                              | 26.2                                 | 10.36               | 5.80  |

**Table S7.** Observed pseudo first order rate constants,  $k_{\text{obs}}$ , for oxidative addition of MeI to **1g** in CH<sub>2</sub>Cl<sub>2</sub>.

| [MeI]/M | $10^3 \text{ } k_{\text{obs}}/\text{s}^{-1}$ |      |      |      |      |
|---------|----------------------------------------------|------|------|------|------|
|         | 15°C                                         | 20°C | 25°C | 30°C | 35°C |
| 0.024   | 3.71                                         |      |      |      |      |
| 0.048   | 7.45                                         | 9.09 | 9.88 | 10.9 | 12.7 |
| 0.072   | 11.0                                         |      |      |      |      |
| 0.096   | 14.0                                         |      |      |      |      |

**Table S8.** Observed steady state absorbance ratios ( $A_{1b}/A_{2b} = A(1993 \text{ cm}^{-1})/A(2074 \text{ cm}^{-1})$ ) and calculated first order rate constants,  $k_2$ , for the migratory insertion reaction of **2b** in CH<sub>2</sub>Cl<sub>2</sub>.

| T (°C) | $A_{1b}/A_{2b}$ | $10^2 \text{ } k_2 (\text{s}^{-1})$ |
|--------|-----------------|-------------------------------------|
| 15     | 24              | 2.28                                |
| 20     | 26              | 3.33                                |
| 25     | 27              | 4.66                                |
| 30     | 29              | 6.47                                |
| 35     | 34              | 9.62                                |

$k_2$  is calculated from observed rate constant for disappearance of **1b** (from Table 2) using the relationship:  $k_2 = k_{\text{obs}} \times (A_{1b}/A_{2b}) \times (\epsilon_{2b}/\epsilon_{1b})$  where the ratio of extinction coefficients ( $\epsilon_{2b}/\epsilon_{1b}$ ) is estimated as 0.5 based on the value observed for complexes **1a** and **1b**.

### Crystallographic data

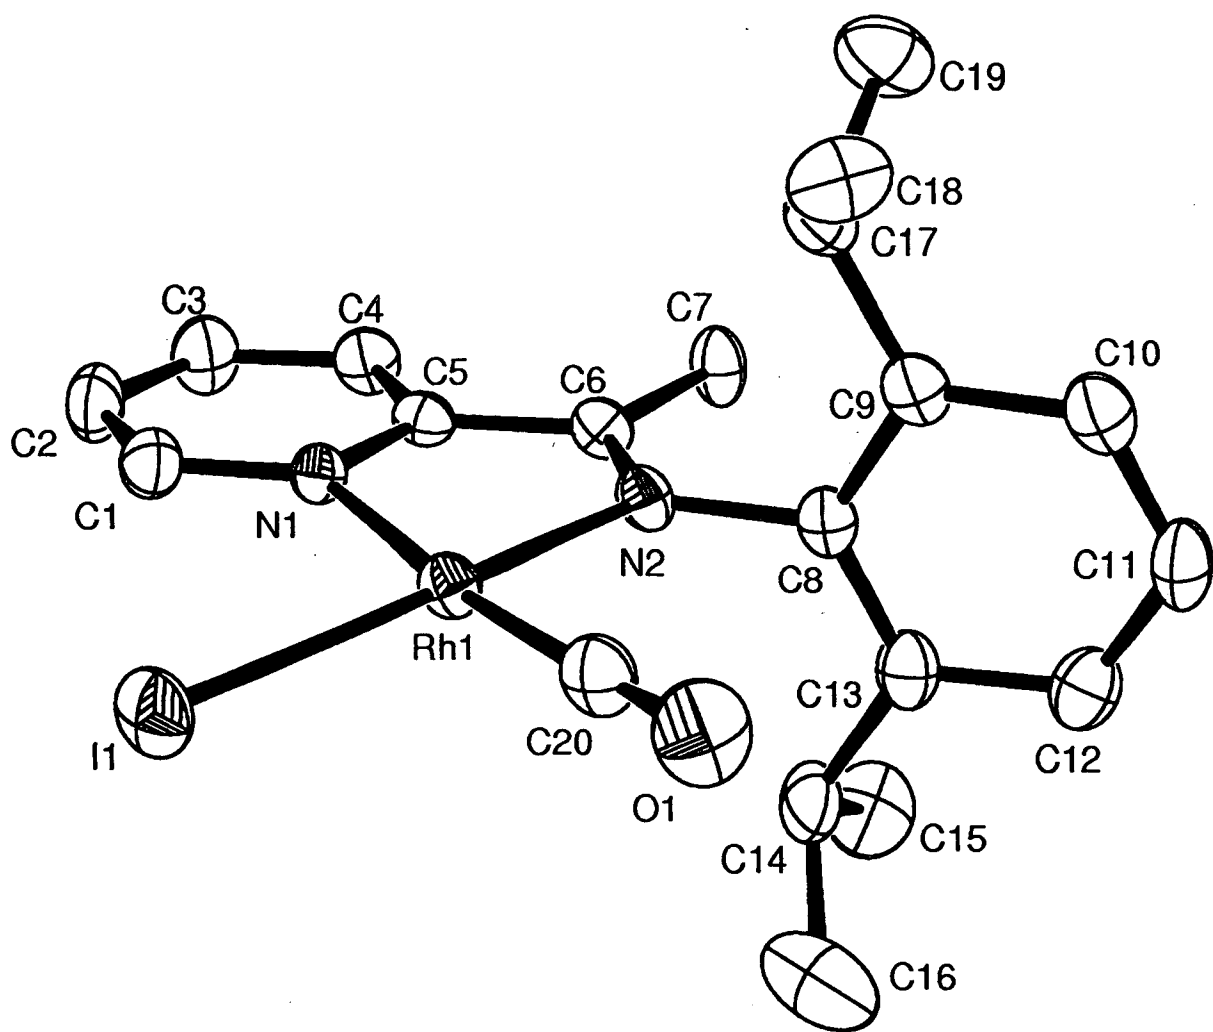

**Figure S1.** ORTEP plot of **1f**. Thermal ellipsoids are shown at the 50% probability level. Hydrogens and the solvent molecule are omitted for clarity. (CIF file provided: iah100).

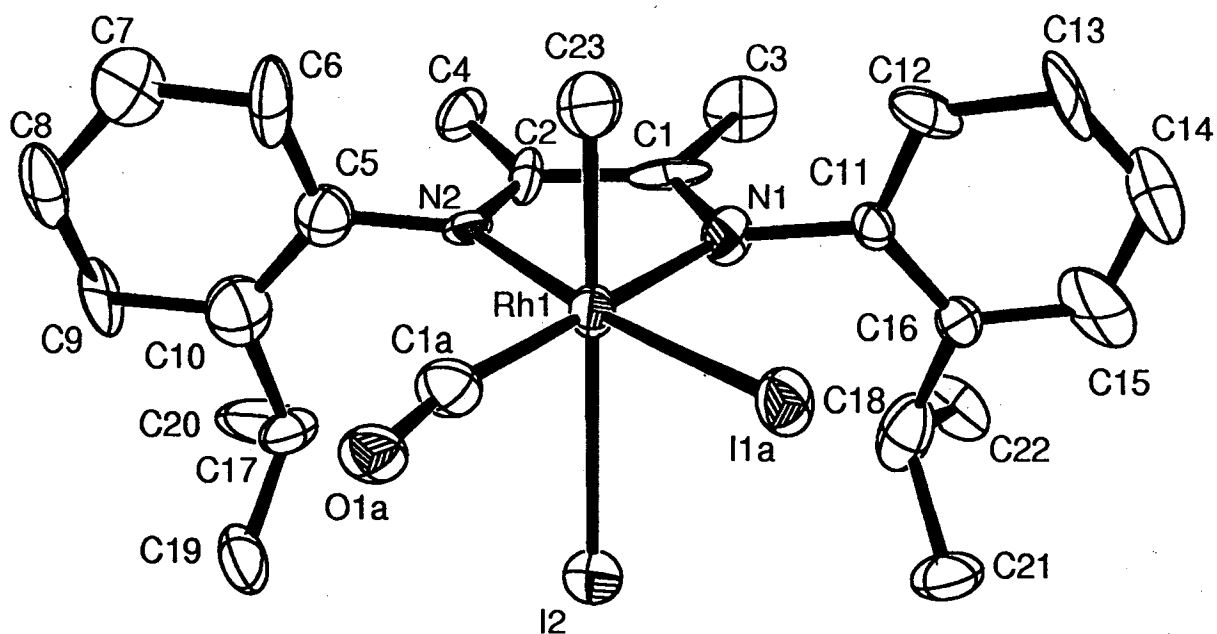

**Figure S2.** ORTEP plot for **2a**. Thermal ellipsoids are shown at the 50% probability level. Hydrogens and the solvent molecule are omitted for clarity. (CIF file provided: iah56a).

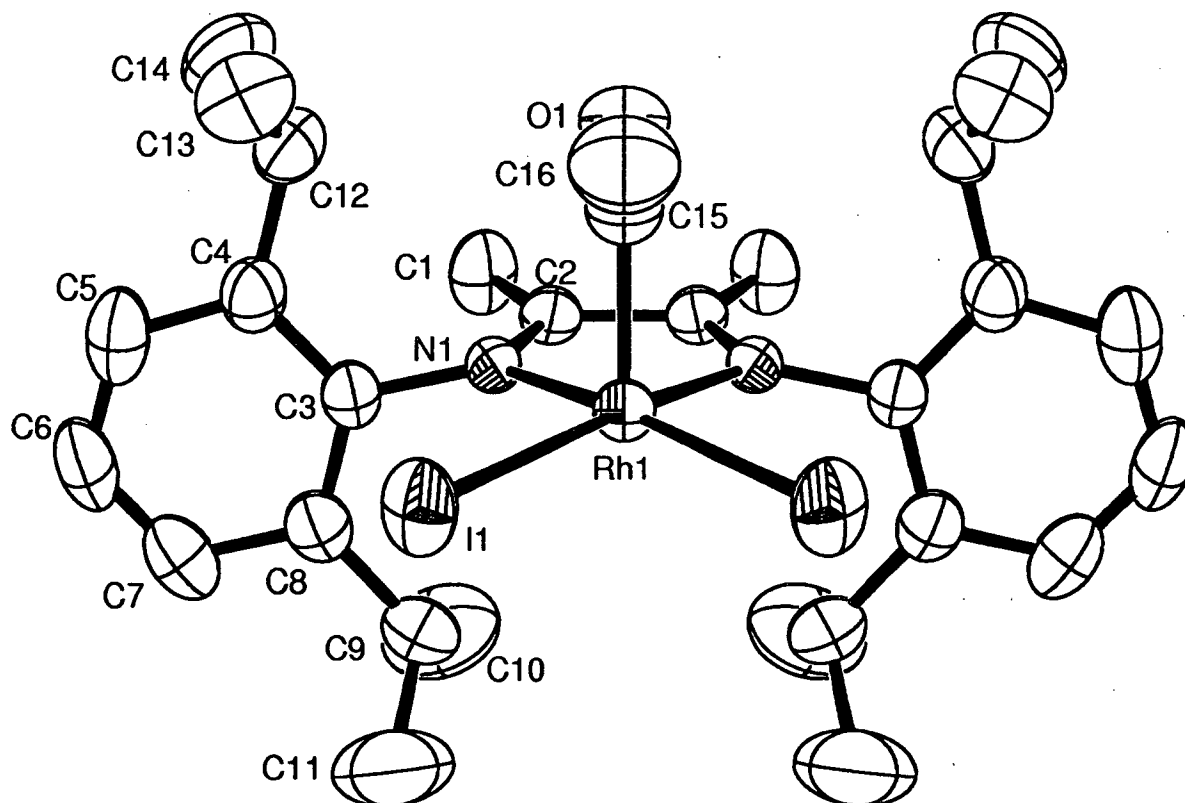

**Figure S3.** ORTEP plot for **3c**. Thermal ellipsoids are shown at the 50% probability level. Hydrogens and the solvent molecule are omitted for clarity. (CIF file provided: iah4m).

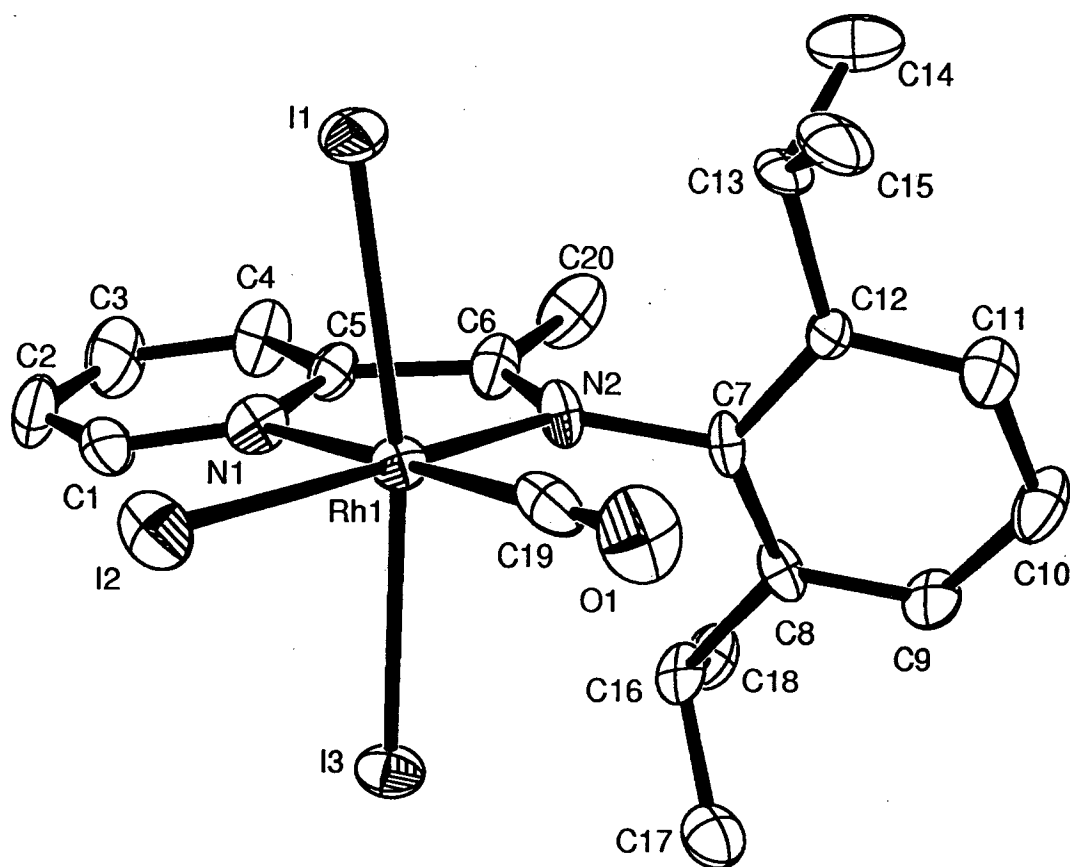

**Figure S4.** ORTEP plot for **4f**. Thermal ellipsoids are shown at the 50% probability level. Hydrogens are omitted for clarity. (CIF file provided: iah82)

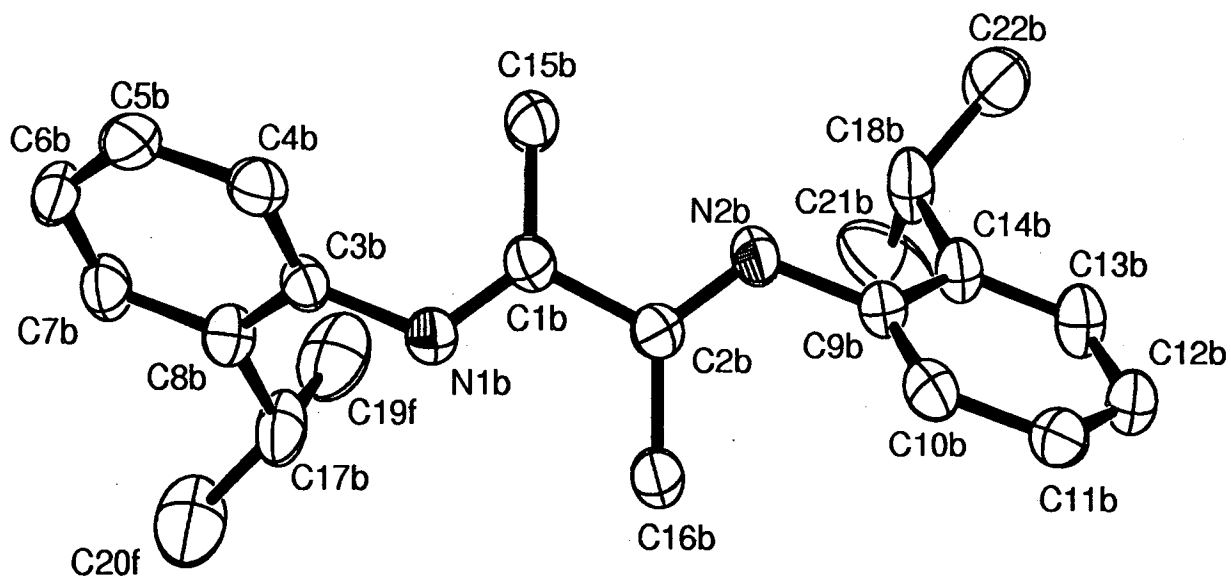

**Figure S5.** ORTEP plot for  $\text{ArN}=\text{C}(\text{Me})\text{C}(\text{Me})=\text{NAr}$  ( $\text{Ar} = 2\text{-}^i\text{PrC}_6\text{H}_4$ ) (one of two independent molecules of similar geometry present in the unit cell). Thermal ellipsoids are shown at the 50% probability level. Hydrogens are omitted for clarity. (CIF file provided: iah55m)
